# Supplementary material for: Effect of Burkholderia tropica and Herbaspirillum frisingense strains on sorghum growth is plant genotype dependent
Source: PeerJ. 2018 Jul 24;6:e5346. doi: 10.7717/peerj.5346 (PMC6063206; doi:10.7717/peerj.5346)
Supplement: Supplemental Information 1 — Sheet 1: Plant biomass raw data. Sheet 2: Root architecture raw data. [file peerj-06-5346-s001.xlsx]

## Sheet: Plant biomass
	Cultivar BRS 330				Cultivar BRS 509				Cultivar SQR				Cultivar SRN-39
IsolateS	Shoot biomass		Root biomass		Shoot biomass		Root biomass		Shoot biomass		Root biomass		Shoot biomass		Root biomass
	fresh weigh	dry weigh	fresh weigh	dry weigh	fresh weigh	dry weigh	fresh weigh	dry weigh	fresh weigh	dry weigh	fresh weigh	dry weigh	fresh weigh	dry weigh	fresh weigh	dry weigh
Control_R1	1.14	0.23	2.153	0.258	0.593	0.151	0.525	0.17	0.437	0.105	0.24	0.081	0.534	0.113	1.093	0.165
Control_R2	1.533	0.344	1.949	0.242	0.148	0.049	0.159	0.026	0.731	0.139	0.38	0.097	0.864	0.212	1.279	0.197
Control_R3	0.713	0.14	1.075	0.14	0.473	0.115	0.659	0.146	0.694	0.165	0.34	0.114	0.236	0.056	0.578	0.097
Control_R4	1.448	0.3	2.087	0.273	0.34	0.077	0.155	0.042	0.741	0.154	0.596	0.113	0.744	0.174	1.047	0.188
Control_R5	1.568	0.327	1.491	0.251	0.67	0.153	0.471	0.106	0.384	0.09	0.145	0.052	0.534	0.104	0.633	0.125
Control_R6	0.947	0.196	2.288	0.27	0.602	0.144	0.568	0.138	NA	NA	NA	NA	0.482	0.101	0.491	0.116
IAC_99_R1	1.366	0.278	1.754	0.216	0.893	0.214	0.488	0.156	0.856	0.197	0.394	0.138	0.142	0.034	0.129	0.029
IAC_99_R2	1.14	0.218	2.523	0.363	0.822	0.192	0.918	0.186	0.695	0.138	0.458	0.119	0.657	0.148	0.751	0.164
IAC_99_R3	0.83	0.146	1.082	0.139	0.475	0.115	0.55	0.114	0.555	0.116	0.357	0.083	0.589	0.152	0.953	0.176
IAC_99_R4	1.806	0.396	2.644	0.293	0.647	0.156	0.826	0.198	0.513	0.073	0.46	0.083	0.219	0.049	0.257	0.055
IAC_99_R5	1.204	0.246	1.506	0.204	0.539	0.124	0.988	0.112	0.507	0.109	0.449	0.087	0.687	0.168	0.755	0.185
IAC_99_R6	1.592	0.32	2.147	0.242	0.484	0.11	0.881	0.145	0.806	0.147	0.332	0.084	0.617	0.141	0.719	0.147
IAC_128_R1	1.235	0.25	2.029	0.263	0.556	0.142	0.653	0.177	0.826	0.162	0.438	0.116	0.294	0.08	0.355	0.092
IAC_128_R2	1.19	0.23	2.258	0.26	0.508	0.121	0.622	0.128	0.716	0.144	0.38	0.106	0.598	0.132	0.774	0.14
IAC_128_R3	1.041	0.199	1.402	0.151	0.516	0.115	0.832	0.221	0.158	0.036	0.1	0.034	0.374	0.105	0.431	0.139
IAC_128_R4	1.027	0.193	1.484	0.142	0.661	0.135	0.346	0.083	0.392	0.058	0.069	0.017	0.188	0.045	0.269	0.043
IAC_128_R5	0.972	0.202	1.417	0.156	0.71	0.157	0.582	0.148	0.976	0.195	0.678	0.141	0.242	0.06	0.307	0.098
IAC_128_R6	1.509	0.312	1.663	0.246	0.306	0.068	0.324	0.077	1.042	0.209	0.846	0.171	NA	NA	NA	NA
IAC_135_R1	0.951	0.207	1.129	0.163	0.392	0.086	0.159	0.059	0.787	0.17	0.575	0.138	0.349	0.08	0.323	0.133
IAC_135_R2	0.98	0.194	1.345	0.303	0.531	0.128	0.328	0.115	0.758	0.165	0.405	0.143	0.422	0.1	0.437	0.115
IAC_135_R3	0.776	0.166	1.28	0.179	0.384	0.091	0.333	0.091	0.49	0.095	0.218	0.08	0.49	0.114	0.533	0.131
IAC_135_R4	1.46	0.3	1.725	0.305	0.405	0.086	0.263	0.06	0.359	0.062	0.137	0.057	0.482	0.122	0.466	0.117
IAC_135_R5	0.826	0.182	0.767	0.231	0.42	0.094	0.508	0.13	0.43	0.083	0.164	0.051	0.443	0.106	0.519	0.105
IAC_135_R6	1.497	0.328	1.242	0.202	0.595	0.128	0.357	0.078	0.425	0.08	0.22	0.04	NA	NA	NA	NA
IAC_141_R1	1.464	0.292	2.64	0.366	0.577	0.138	0.483	0.109	0.192	0.036	0.089	0.025	0.704	0.183	0.62	0.193
IAC_141_R2	1.047	0.203	1.586	0.256	0.582	0.131	0.627	0.1	0.369	0.089	0.148	0.06	0.342	0.082	0.331	0.062
IAC_141_R3	1.533	0.324	2.132	0.26	0.263	0.064	0.114	0.03	0.727	0.14	0.301	0.108	0.707	0.166	0.732	0.171
IAC_141_R4	1.574	0.322	1.61	0.309	0.075	0.018	0.054	0.009	1.369	0.273	0.843	0.162	0.647	0.153	0.525	0.115
IAC_141_R5	0.567	0.1	0.933	0.176	0.749	0.161	0.421	0.103	0.631	0.123	0.478	0.108	0.483	0.124	0.749	0.138
IAC_141_R6	1.798	0.376	2.005	0.332	0.654	0.141	0.652	0.118	NA	NA	NA	NA	0.455	0.095	0.447	0.068
IAC_152_R1	1.17	0.234	0.92	0.204	0.712	0.153	0.556	0.104	0.704	0.15	0.351	0.108	0.481	0.134	0.518	0.148
IAC_152_R2	1.251	0.248	1.498	0.245	0.477	0.101	0.65	0.152	0.699	0.155	0.38	0.141	0.528	0.148	0.457	0.155
IAC_152_R3	1.053	0.221	1.396	0.236	0.577	0.125	0.649	0.166	0.573	0.114	0.439	0.124	0.239	0.079	0.241	0.089
IAC_152_R4	1.211	0.258	1.519	0.306	0.486	0.111	0.654	0.209	0.472	0.1	0.347	0.129	0.655	0.156	0.398	0.103
IAC_152_R5	1.687	0.361	1.86	0.285	0.133	0.042	0.168	0.04	0.977	0.197	0.427	0.149	0.369	0.11	0.318	0.102
IAC_152_R6	1.087	0.212	1.246	0.245	0.434	0.095	0.384	0.08	NA	NA	NA	NA	NA	NA	NA	NA

## Sheet: root architecture
	Cultivar BRS 330								Cultivar BRS_509								Cultivar SQR
	Length(cm)	Surface_Area(cm2)	Average_Diameter(mm)	Root_Volume(cm3)	Root_Dry_Biomass	SRL	SRA	SRDENS	Length(cm)	Surface_Area(cm2)	Average_Diameter(mm)	Root_Volume(cm3)	Root_Dry_Biomass	SRL	SRA	SRDENS	Length(cm)	Surface_Area(cm2)	Average_Diameter(mm)	Root_Volume(cm3)	Root_Dry_Biomass	SRL	SRA	SRDENS	Length(cm)	SurfArea(cm2)	AvgDiam(mm)	RootVolume(cm3)	RDB	SRL	SRA	SRDENS
Control_R1	1627.64	220.612	0.4314	2.38	0.258	630.868	855.086	0.108403	771.266	93.3273	0.3852	0.899	0.17	453.686	548.984	0.189099	749.672	82.9806	0.3523	0.731	0.081	925.521	1024.45	0.110807	904.307	125.012	0.44	1.375	0.165	548.065	757.649	0.12
Control_R2	1446.31	220.358	0.485	2.672	0.242	597.647	910.569	0.0905689	196.343	13.1717	0.2135	0.07	0.026	755.164	506.604	0.371429	865.967	98.3751	0.3616	0.889	0.097	892.749	1014.18	0.109111	930.359	142.709	0.4883	1.742	0.197	472.264	724.411	0.113088
Control_R3	987.611	142.384	0.4589	1.634	0.14	705.436	1017.03	0.0856793	521.641	72.7122	0.4437	0.807	0.146	357.288	498.029	0.180917	987.631	111.147	0.3582	0.995	0.114	866.343	974.975	0.114573	809.371	95.8717	0.377	0.904	0.097	834.403	988.368	0.107301
Control_R4	1742.43	239.583	0.4377	2.621	0.273	638.251	877.592	0.104159	1686.58	208.698	0.3939	2.055	0.042	4015.67	4969.01	0.020438	779.989	102.336	0.4176	1.068	0.113	690.255	905.63	0.105805	1415.6	157.783	0.3548	1.399	0.188	752.98	839.272	0.134382
Control_R5	1339.87	203.663	0.4838	2.464	0.251	533.814	811.408	0.101867	716.767	93.6316	0.4158	0.973	0.106	676.195	883.317	0.108941	610.056	61.8271	0.3226	0.499	0.052	1173.18	1188.98	0.104208	1036.52	115.842	0.3557	1.03	0.125	829.219	926.738	0.121359
Control_R6	1483.39	219.87	0.4718	2.593	0.27	549.404	814.335	0.104126	653.714	85.7064	0.4173	0.894	0.138	473.706	621.061	0.154362	NA	NA	NA	NA	NA	NA	NA	NA	NA	NA	NA	NA	NA	NA	NA	NA
IAC_99_R1	1468.83	210.973	0.4572	2.411	0.216	680.012	976.726	0.0895894	1063.46	118.674	0.3552	1.054	0.156	681.702	760.728	0.148008	1057.14	125.832	0.3789	1.192	0.138	766.047	911.83	0.115772	464.449	44.0218	0.3017	0.332	0.029	1601.55	1517.99	0.0873494
IAC_99_R2	1895.22	230.092	0.3864	2.223	0.363	522.098	633.861	0.163293	802.918	109.822	0.4354	1.195	0.186	431.676	590.44	0.155649	923.753	94.8256	0.3268	0.775	0.119	776.263	796.854	0.153548	881.83	124.654	0.45	1.402	0.164	537.701	760.087	0.116976
IAC_99_R3	1263.06	162.797	0.4103	1.67	0.139	908.678	1171.2	0.0832335	788.403	90.2101	0.3642	0.821	0.114	691.582	791.317	0.138855	693.13	83.7648	0.3847	0.806	0.083	835.096	1009.21	0.102978	1218.78	147.796	0.386	1.426	0.176	692.489	839.748	0.123422
IAC_99_R4	1873.1	261.416	0.4442	2.903	0.293	639.285	892.203	0.10093	745.917	106.783	0.4557	1.216	0.198	376.726	539.31	0.162829	850.873	94.6815	0.3542	0.838	0.083	1025.15	1140.74	0.0990453	590.663	79.0705	0.4261	0.842	0.055	1073.93	1437.65	0.0653207
IAC_99_R5	1327.09	179.267	0.43	1.927	0.204	650.532	878.761	0.105864	831.832	113.46	0.4342	1.232	0.112	742.707	1013.04	0.0909091	811.063	99.5474	0.3907	0.972	0.087	932.256	1144.22	0.0895062	1348.79	145.425	0.3432	1.248	0.185	729.078	786.082	0.148237
IAC_99_R6	1609.03	243.792	0.4823	2.939	0.242	664.887	1007.4	0.0823409	573.76	80.0468	0.4441	0.889	0.145	395.697	552.047	0.163105	1008.73	101.311	0.3197	0.81	0.084	1200.87	1206.09	0.103704	835.705	120.991	0.4608	1.394	0.147	568.507	823.065	0.105452
IAC_128_R1	1734.93	236.282	0.4335	2.561	0.263	659.671	898.413	0.102694	798.923	90.1686	0.3593	0.81	0.177	451.369	509.427	0.218519	885.704	103.764	0.3729	0.967	0.116	763.538	894.519	0.119959	906.172	94.8198	0.3331	0.79	0.092	984.969	1030.65	0.116456
IAC_128_R2	1323.19	210.385	0.5061	2.662	0.26	508.918	809.174	0.0976709	574.807	80.3722	0.4451	0.894	0.128	449.068	627.908	0.143177	1302.36	110.67	0.2705	0.748	0.106	1228.64	1044.05	0.141711	1082.82	137.639	0.4046	1.392	0.14	773.444	983.139	0.100575
IAC_128_R3	1475.89	189.516	0.4087	1.937	0.151	977.412	1255.07	0.0779556	954.843	108.799	0.3627	0.987	0.221	432.056	492.303	0.223911	387.451	45.4624	0.3735	0.425	0.034	1139.56	1337.13	0.08	959.659	101.167	0.3356	0.849	0.139	690.402	727.817	0.163722
IAC_128_R4	1397.2	208.523	0.4751	2.477	0.142	983.946	1468.47	0.0573274	550.778	68.0487	0.3933	0.669	0.083	663.588	819.864	0.124066	484.235	38.6957	0.2544	0.246	0.017	2848.44	2276.22	0.0691057	476.517	72.373	0.4834	0.875	0.043	1108.18	1683.09	0.0491429
IAC_128_R5	1337.55	194.765	0.4635	2.257	0.156	857.402	1248.5	0.0691183	884.341	102.081	0.3674	0.938	0.148	597.527	689.733	0.157783	920.537	120.551	0.4169	1.256	0.141	652.863	854.973	0.112261	832.066	86.7359	0.3318	0.719	0.098	849.047	885.06	0.1363
IAC_128_R6	1628.42	229.271	0.4482	2.569	0.246	661.961	931.997	0.0957571	428.215	51.1367	0.3801	0.486	0.077	556.123	664.113	0.158436	1179.12	153.351	0.414	1.587	0.171	689.544	896.787	0.10775	NA	NA	NA	NA	NA	NA	NA	NA
IAC_135_R1	1333.65	184.151	0.4395	2.023	0.163	818.187	1129.76	0.0805734	394.818	40.8821	0.3296	0.337	0.059	669.183	692.917	0.175074	897.945	128.162	0.4543	1.456	0.138	650.685	928.713	0.0947802	880.427	114.954	0.4156	1.194	0.133	661.975	864.313	0.11139
IAC_135_R2	1339.22	177.227	0.4212	1.866	0.303	441.987	584.909	0.162379	673.832	84.1637	0.3976	0.837	0.115	585.941	731.858	0.137395	1189.36	136.974	0.3666	1.255	0.143	831.718	957.859	0.113944	1266.74	127.066	0.3193	1.014	0.115	1101.51	1104.92	0.113412
IAC_135_R3	1181.5	162.02	0.4365	1.768	0.179	660.058	905.142	0.101244	533.912	65.8583	0.3926	0.646	0.091	586.716	723.718	0.140867	735.797	97.9659	0.4238	1.038	0.08	919.746	1224.57	0.0770713	913.07	111.883	0.39	1.091	0.131	697	854.073	0.120073
IAC_135_R4	1822.3	227.798	0.3979	2.266	0.305	597.476	746.878	0.134598	505.471	57.0764	0.3594	0.513	0.06	842.452	951.273	0.116959	672.756	65.3901	0.3094	0.506	0.057	1180.27	1147.19	0.112648	1346.76	137.61	0.3252	1.119	0.117	1151.08	1176.15	0.104558
IAC_135_R5	1189.55	150.546	0.4028	1.516	0.231	514.959	651.716	0.152375	640.143	79.7384	0.3965	0.79	0.13	492.418	613.372	0.164557	637.957	79.1235	0.3948	0.781	0.051	1250.9	1551.44	0.0653009	843.041	113.767	0.4296	1.222	0.105	802.896	1083.49	0.0859247
IAC_135_R6	1702.81	207.657	0.3882	2.015	0.202	842.977	1028	0.100248	622.733	75.2934	0.3849	0.724	0.078	798.375	965.3	0.107735	602.287	65.127	0.3442	0.56	0.04	1505.72	1628.17	0.0714286	NA	NA	NA	NA	NA	NA	NA	NA
IAC_141_R1	1808.03	246.627	0.4342	2.677	0.366	493.999	673.846	0.13672	764.617	87.4638	0.3641	0.796	0.109	701.483	802.42	0.136935	536.838	54.4036	0.3226	0.439	0.025	2147.35	2176.14	0.0569476	1746.05	177.929	0.3244	1.443	0.193	904.69	921.913	0.133749
IAC_141_R2	1469.43	198.179	0.4293	2.127	0.256	573.997	774.136	0.120357	742.813	87.7736	0.3761	0.825	0.1	742.813	877.736	0.121212	673.418	78.0018	0.3687	0.719	0.06	1122.36	1300.03	0.0834492	423.159	64.6329	0.4862	0.786	0.062	682.514	1042.47	0.0788804
IAC_141_R3	1808.32	255.327	0.4494	2.869	0.26	695.506	982.025	0.0906239	288.88	26.3966	0.2909	0.192	0.03	962.934	879.887	0.15625	1038.45	102.774	0.315	0.809	0.108	961.529	951.61	0.133498	1340.41	144.087	0.3422	1.233	0.171	783.867	842.616	0.138686
IAC_141_R4	1920.97	243.939	0.4042	2.465	0.309	621.673	789.446	0.125355	261.829	21.5149	0.2616	0.141	0.009	2909.21	2390.54	0.0638298	1401.44	168.549	0.3828	1.613	0.162	865.084	1040.43	0.100434	861.335	115.526	0.4269	1.233	0.115	748.987	1004.58	0.0932685
IAC_141_R5	828.965	112.627	0.4325	1.218	0.176	471.003	639.928	0.144499	759.229	91.6928	0.3844	0.881	0.103	737.115	890.221	0.116913	1052.65	102.947	0.3113	0.801	0.108	974.673	953.209	0.134831	1413.73	149.174	0.3359	1.253	0.138	1024.44	1080.97	0.110136
IAC_141_R6	1698.81	248.176	0.465	2.885	0.332	511.689	747.519	0.115078	913.657	111.165	0.3873	1.076	0.118	774.285	942.074	0.109665	NA	NA	NA	NA	NA	NA	NA	NA	786.129	93.5755	0.3789	0.886	0.068	1156.07	1376.11	0.0767494
IAC_152_R1	1239.11	161.129	0.4139	1.667	0.204	607.404	789.848	0.122376	909.33	104.365	0.3653	0.953	0.104	874.355	1003.51	0.109129	1000.33	103.731	0.3301	0.856	0.108	926.229	960.47	0.126168	1204.11	131.935	0.3488	1.15	0.148	813.59	891.449	0.128696
IAC_152_R2	1284.26	182.265	0.4518	2.058	0.245	524.188	743.939	0.119048	735.545	92.9628	0.4023	0.935	0.152	483.911	611.597	0.162567	1300.56	130.489	0.3194	1.042	0.141	922.385	925.457	0.135317	997.805	118.962	0.3795	1.129	0.155	643.745	767.499	0.13729
IAC_152_R3	1382.73	182.045	0.4191	1.907	0.236	585.904	771.376	0.123755	836.146	98.4066	0.3746	0.922	0.166	503.703	592.811	0.180043	1048.35	105.303	0.3197	0.842	0.124	845.446	849.22	0.147268	555.49	75.2933	0.4314	0.812	0.089	624.146	845.992	0.109606
IAC_152_R4	1970.8	234.543	0.3788	2.221	0.306	644.051	766.482	0.137776	751.731	88.6305	0.3753	0.832	0.209	359.68	424.069	0.251202	1012.55	110.212	0.3465	0.955	0.129	784.925	854.355	0.135079	1071.97	113.405	0.3367	0.955	0.103	1040.74	1101.02	0.107853
IAC_152_R5	1730.89	245.523	0.4515	2.771	0.285	607.329	861.486	0.102851	301.235	27.5933	0.2916	0.201	0.04	753.086	689.832	0.199005	1478.39	148.952	0.3207	1.194	0.149	992.211	999.681	0.124791	908.692	98.7095	0.3458	0.853	0.102	890.875	967.74	0.119578
IAC_152_R6	1623.87	193.179	0.3787	1.829	0.245	662.804	788.485	0.133953	607.341	71.8726	0.3767	0.677	0.08	759.176	898.408	0.118168	NA	NA	NA	NA	NA	NA	NA	NA	NA	NA	NA	NA	NA	NA	NA	NA
